# Supplementary material
Source: publisher figshare collection journal article supplement (https://gsajournals.figshare.com/ndownloader/files/17519765)
Supplement: Supplementary file 1 [file 17519765]

## Sheet: Sheet1
Supplemental Table S1: Proportion of NHEJ with processing, intrachromosomal HR and interhomolog HR repair in male and female adults using TIDE analysis
		Proportion of repair out of detectable repair events (1)		Proportion of total HR events (2)
Sex	Sample name	NHEJ with processing	Total HR	Intrachromosomal HR	Interhomolog HR
Male	DR-white/iwhiteΔ9 1	88.2192	11.7808	100	0
	DR-white/iwhiteΔ9 2	27.3077	72.6923	99.4709	0.529101
	DR-white/iwhiteΔ9 3	57.7608	42.2392	99.3976	0.60241
	DR-white/iwhiteΔ9 4	70.229	29.771	100	0
	DR-white/iwhiteΔ9 5	85.6061	14.3939	100	0
	Mean	65.8246	34.1754	99.7737	0.226302
	S.E.M	3.15982	11.0923	0.113546	0.113546
Female	DR-white/iwhiteΔ9 1	81.5068	18.4932	100	0
	DR-white/iwhiteΔ9 2	52.9661	47.0339	100	0
	DR-white/iwhiteΔ9 3	59.7561	40.2439	91.6667	8.33333
	DR-white/iwhiteΔ9 4	93.3934	6.60661	100	0
	Mean	71.9056	28.0944	97.9167	2.08333
	S.E.M	9.39958	9.39958	1.61374	1.61374
Combined	Mean	68.5272	31.4728	98.9484	1.05165
	S.E.M	7.07421	7.07421	0.913887	0.913887
P value (3)	female v. male	0.688303	0.688303	0.438782	0.438782
Male	DR-whiteΔ9/iwhite 1	74.8744	25.1256	94	6
	DR-whiteΔ9/iwhite 2	83.8428	16.1572	59.4595	40.5405
	DR-whiteΔ9/iwhite 3	38.6266	61.3734	79.7203	20.2797
	DR-whiteΔ9/iwhite 4	76.087	23.913	87.8788	12.1212
	DR-whiteΔ9/iwhite 5	65.0307	34.9693	94.7368	5.26316
	DR-whiteΔ9/iwhite 6	77.9817	22.0183	77.0833	22.9167
	DR-whiteΔ9/iwhite 7	55.4054	44.5946	75.7576	24.2424
	DR-whiteΔ9/iwhite 8	33.9506	66.0494	70.0935	29.9065
	Mean	63.2249	36.7751	79.8412	20.1588
	S.E.M	6.21297	6.21297	4.27134	4.27134
Female	DR-whiteΔ9/iwhite 1	66.8394	33.1606	71.875	28.125
	DR-whiteΔ9/iwhite 2	35.0211	64.9789	65.5844	34.4156
	DR-whiteΔ9/iwhite 3	15.2074	84.7926	92.3913	7.6087
	DR-whiteΔ9/iwhite 4	32.3651	67.6349	75.4601	24.5399
	DR-whiteΔ9/iwhite 5	36	64	63.75	36.25
	DR-whiteΔ9/iwhite 6	26.4151	73.5849	68.7179	31.2821
	Mean	35.308	64.692	72.9631	27.0369
	S.E.M	7.03934	7.03934	3.59305	3.59305
Combined	Mean	51.2605	48.7395	76.8935	23.1065
	S.E.M	3.13866	6.0352	3.07963	3.07963
P value	female v. male	0.0143599	0.0143599	0.276592	0.276592
P value	DR-white/iwhiteΔ9 v. DR-whiteΔ9/ iwhite (combined)	0.0797608	0.0797608	< 0.00001	<0.00001
(1) TIDE-detectable repair events include NHEJ associated with indels (+/- 1 to 35 nucleotides) and total HR events (intrachromosomal HR and interhomolog HR). Porportion of undetectable events with 0 nucleotide change is omitted, as this could result from no DSB, precise NHEJ, or intersister HR.
(2) Data reported as "combined" for intrachromosomal and interhomolog HR is summarized in Figure 3.
(3) All P values were determined by two-tailed unpaired Student's t test.
